# Supplementary material for: Long-term safety and efficacy of sirukumab for patients with rheumatoid arthritis who previously received sirukumab in randomised controlled trials (SIRROUND-LTE)
Source: HighWire-hosted journal article supplement (doi:10.1136/rmdopen-2020-001465), 2021-01-01
Supplement: rmdopen-2020-001465supp001_data_supplement.pdf [file rmdopen-2020-001465supp001_data_supplement.pdf]

## Data Supplement

**Supplemental Table 1.** Treatment emergent adverse events (TEAE) in the long term extension (LTE) study. Numbers of subjects with one or more TEAE (% subjects), total subject-years of exposure from first dose in LTE to last dose + up to 5 half-lives (exposure), and incidence per 100 subject-years of exposure with 95% confidence intervals (Incidence)

|                                               |                        | Placebo →<br>50 mg q4w | Placebo →<br>100 mg<br>q2w | 50 mg<br>q4w<br>Start | 100 mg<br>q2w<br>Start | 50 mg q4w<br>combined | 100 mg q2w<br>combined | Combined          |
|-----------------------------------------------|------------------------|------------------------|----------------------------|-----------------------|------------------------|-----------------------|------------------------|-------------------|
| MI                                            | % subjects             | 1 (0.3%)               | 0                          | 5 (0.8%)              | 3 (0.5%)               | 6 (0.7%)              | 3 (0.3%)               | 9 (0.5%)          |
|                                               | Exposure (PY)          | 983.5                  | 929.2                      | 2345.2                | 2414.5                 | 3328.6                | 3343.7                 | 6672.3            |
|                                               | Incidence (per 100 PY) | 0.10 (0.00,<br>0.57)   | 0.00 (0.00,<br>0.32)       | 0.21 (0.07,<br>0.50)  | 0.12 (0.03,<br>0.36)   | 0.18 (0.07,<br>0.39)  | 0.09 (0.02,<br>0.26)   | 0.13 (0.06, 0.26) |
| Death                                         | % subjects             | 5 (1.6%)               | 6 (2.1%)                   | 13 (2.1%)             | 8 (1.3%)               | 18 (2.0%)             | 14 (1.5%)              | 32 (1.8%)         |
|                                               | Exposure (PY)          | 986.2                  | 929.2                      | 2352.7                | 2418.3                 | 3338.9                | 3347.5                 | 6686.4            |
|                                               | Incidence (per 100 PY) | 0.51 (0.16,<br>1.18)   | 0.65 (0.24,<br>1.41)       | 0.55 (0.29,<br>0.94)  | 0.33 (0.14,<br>0.65)   | 0.54 (0.32,<br>0.85)  | 0.42 (0.23,<br>0.70)   | 0.48 (0.33, 0.68) |
| MACE                                          | % subjects             | 6 (2.0%)               | 2 (0.7%)                   | 22 (3.6%)             | 7 (1.1%)               | 28 (3.1%)             | 9 (1.0%)               | 37 (2.0%)         |
|                                               | Exposure (PY)          | 982.9                  | 929.1                      | 2324.3                | 2412.6                 | 3307.2                | 3341.7                 | 6648.9            |
|                                               | Incidence (per 100 PY) | 0.61 (0.22,<br>1.33)   | 0.22 (0.03,<br>0.78)       | 0.95 (0.59,<br>1.43)  | 0.29 (0.12,<br>0.60)   | 0.85 (0.56,<br>1.22)  | 0.27 (0.12,<br>0.51)   | 0.56 (0.39, 0.77) |
| Stroke                                        | % subjects             | 3 (1.0%)               | 2 (0.7%)                   | 7 (1.2%)              | 3 (0.5%)               | 10 (1.1%)             | 5 (0.5%)               | 15 (0.8%)         |
|                                               | Exposure (PY)          | 985.7                  | 929.1                      | 2344.7                | 2416.4                 | 3330.4                | 3345.5                 | 6675.9            |
|                                               | Incidence (per 100 PY) | 0.30 (0.06,<br>0.89)   | 0.22 (0.03,<br>0.78)       | 0.30 (0.12,<br>0.62)  | 0.12 (0.03,<br>0.36)   | 0.30 (0.14,<br>0.55)  | 0.15 (0.05,<br>0.35)   | 0.22 (0.13, 0.37) |
| Malignancies                                  | % subjects             | 4 (1.3%)               | 11 (3.8%)                  | 11 (1.8%)             | 13 (2.1%)              | 15 (1.6%)             | 24 (2.6%)              | 39 (2.1%)         |
|                                               | Exposure (PY)          | 980.6                  | 924.2                      | 2345.1                | 2406.9                 | 3325.7                | 3331.2                 | 6656.9            |
|                                               | Incidence (per 100 PY) | 0.41 (0.11,<br>1.04)   | 1.19 (0.59,<br>2.13)       | 0.47 (0.23,<br>0.84)  | 0.54 (0.29,<br>0.92)   | 0.45 (0.25,<br>0.74)  | 0.72 (0.46,<br>1.07)   | 0.59 (0.42, 0.80) |
| Malignancies<br>(excluding non-<br>Melanomas) | % subjects             | 2 (0.7%)               | 8 (2.7%)                   | 7 (1.2%)              | 7 (1.1%)               | 9 (1.0%)              | 15 (1.6%)              | 24 (1.3%)         |
|                                               | Exposure (PY)          | 985.9                  | 927.3                      | 2350.8                | 2416.5                 | 3336.7                | 3343.8                 | 6680.4            |

|                                                                                   |                        |                   |                   |                   |                   |                   |                   |                   |
|-----------------------------------------------------------------------------------|------------------------|-------------------|-------------------|-------------------|-------------------|-------------------|-------------------|-------------------|
|                                                                                   | Incidence (per 100 PY) | 0.20 (0.02, 0.73) | 0.86 (0.37, 1.70) | 0.30 (0.12, 0.61) | 0.29 (0.12, 0.60) | 0.27 (0.12, 0.51) | 0.45 (0.25, 0.74) | 0.36 (0.23, 0.53) |
| Serious Infections                                                                | % subjects             | 28 (9.2%)         | 40 (13.7%)        | 78 (12.9%)        | 73 (11.8%)        | 106 (11.6%)       | 113 (12.4%)       | 219 (12.0%)       |
|                                                                                   | Exposure (PY)          | 957.2             | 891.6             | 2264.2            | 2336.8            | 3221.4            | 3228.5            | 6449.9            |
|                                                                                   | Incidence (per 100 PY) | 2.93 (1.94, 4.23) | 4.49 (3.20, 6.11) | 3.44 (2.72, 4.30) | 3.12 (2.45, 3.93) | 3.29 (2.69, 3.98) | 3.50 (2.88, 4.21) | 3.40 (2.96, 3.88) |
| GI Perforations                                                                   | % subjects             | 2 (0.7%)          | 4 (1.4%)          | 4 (0.7%)          | 3 (0.5%)          | 6 (0.7%)          | 7 (0.8%)          | 13 (0.7%)         |
|                                                                                   | Exposure (PY)          | 985.9             | 927.9             | 2352.2            | 2417.3            | 3338.2            | 3345.2            | 6683.4            |
|                                                                                   | Incidence (per 100 PY) | 0.20 (0.02, 0.73) | 0.43 (0.12, 1.10) | 0.17 (0.05, 0.44) | 0.12 (0.03, 0.36) | 0.18 (0.07, 0.39) | 0.21 (0.08, 0.43) | 0.19 (0.10, 0.33) |
| Lower GI Perforations                                                             | % subjects             | 2 (0.7%)          | 4 (1.4%)          | 4 (0.7%)          | 3 (0.5%)          | 6 (0.7%)          | 7 (0.8%)          | 13 (0.7%)         |
|                                                                                   | Exposure (PY)          | 985.9             | 927.9             | 2352.2            | 2417.3            | 3338.2            | 3345.2            | 6683.4            |
|                                                                                   | Incidence (per 100 PY) | 0.20 (0.02, 0.73) | 0.43 (0.12, 1.10) | 0.17 (0.05, 0.44) | 0.12 (0.03, 0.36) | 0.18 (0.07, 0.39) | 0.21 (0.08, 0.43) | 0.19 (0.10, 0.33) |
| Upper GI Perforations                                                             | % subjects             | 0                 | 0                 | 0                 | 0                 | 0                 | 0                 | 0                 |
|                                                                                   | Exposure (PY)          | 986.2             | 929.2             | 2352.7            | 2418.3            | 3338.9            | 3347.5            | 6686.4            |
|                                                                                   | Incidence (per 100 PY) | 0.00 (0.00, 0.30) | 0.00 (0.00, 0.32) | 0.00 (0.00, 0.13) | 0.00 (0.00, 0.12) | 0.00 (0.00, 0.09) | 0.00 (0.00, 0.09) | 0.00 (0.00, 0.04) |
| Hepatobiliary                                                                     | % subjects             | 0                 | 2 (0.7%)          | 1 (0.2%)          | 1 (0.2%)          | 1 (0.1%)          | 3 (0.3%)          | 4 (0.2%)          |
|                                                                                   | Exposure (PY)          | 986.2             | 928.6             | 2352.3            | 2417.9            | 3338.6            | 3346.6            | 6685.1            |
|                                                                                   | Incidence (per 100 PY) | 0.00 (0.00, 0.30) | 0.22 (0.03, 0.78) | 0.04 (0.00, 0.24) | 0.04 (0.00, 0.23) | 0.03 (0.00, 0.17) | 0.09 (0.02, 0.26) | 0.06 (0.02, 0.15) |
| Serious Opportunistic Infections                                                  | % subjects             | 0                 | 0                 | 1 (0.2%)          | 1 (0.2%)          | 1 (0.1%)          | 1 (0.1%)          | 2 (0.1%)          |
|                                                                                   | Exposure (PY)          | 986.2             | 929.2             | 2352.5            | 2418.0            | 3338.7            | 3347.2            | 6685.9            |
|                                                                                   | Incidence (per 100 PY) | 0.00 (0.00, 0.30) | 0.00 (0.00, 0.32) | 0.04 (0.00, 0.24) | 0.04 (0.00, 0.23) | 0.03 (0.00, 0.17) | 0.03 (0.00, 0.17) | 0.03 (0.00, 0.11) |
| Serious or Moderate/Severe Systemic Hypersensitivity Reactions, or Serum Sickness | % subjects             | 1 (0.3%)          | 2 (0.7%)          | 2 (0.3%)          | 2 (0.3%)          | 3 (0.3%)          | 4 (0.4%)          | 7 (0.4%)          |
|                                                                                   | Exposure (PY)          | 986.0             | 924.4             | 2347.8            | 2416.0            | 3333.8            | 3340.4            | 6674.2            |
|                                                                                   | Incidence (per 100 PY) | 0.10 (0.00, 0.57) | 0.22 (0.03, 0.78) | 0.09 (0.01, 0.31) | 0.08 (0.01, 0.30) | 0.09 (0.02, 0.26) | 0.12 (0.03, 0.31) | 0.10 (0.04, 0.22) |

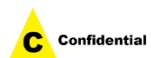

|                                         |                        |                    |                     |                     |                   |                    |                    |                    |
|-----------------------------------------|------------------------|--------------------|---------------------|---------------------|-------------------|--------------------|--------------------|--------------------|
| Serious Event<br>Pneumonia              | % subjects             | 9 (3.0%)           | 11 (3.8%)           | 14 (2.3%)           | 23 (3.7%)         | 23 (2.5%)          | 34 (3.7%)          | 57 (3.1%)          |
|                                         | Exposure (PY)          | 976.3              | 919.5               | 2338.3              | 2392.3            | 3314.6             | 3311.8             | 6626.4             |
|                                         | Incidence (per 100 PY) | 0.92 (0.42, 1.75)  | 1.20 (0.60, 2.14)   | 0.60 (0.33, 1.00)   | 0.96 (0.61, 1.44) | 0.69 (0.44, 1.04)  | 1.03 (0.71, 1.43)  | 0.86 (0.65, 1.11)  |
| Serious Events of<br>Demyelination      | % subjects             | 0                  | 0                   | 0                   | 0                 | 0                  | 0                  | 0                  |
|                                         | Exposure (PY)          | 986.2              | 929.2               | 2352.7              | 2418.3            | 3338.9             | 3347.5             | 6686.4             |
|                                         | Incidence (per 100 PY) | 0.00 (0.00, 0.30)  | 0.00 (0.00, 0.32)   | 0.00 (0.00, 0.13)   | 0.00 (0.00, 0.12) | 0.00 (0.00, 0.09)  | 0.00 (0.00, 0.09)  | 0.00 (0.00, 0.04)  |
| Serious Adverse<br>Events of Cellulitis | % subjects             | 4 (1.3%)           | 8 (2.7%)            | 28 (4.6%)           | 21 (3.4%)         | 32 (3.5%)          | 29 (3.2%)          | 61 (3.4%)          |
|                                         | Exposure (PY)          | 983.6              | 921.5               | 2329.1              | 2391.1            | 3312.7             | 3312.6             | 6625.3             |
|                                         | Incidence (per 100 PY) | 0.41 (0.11, 1.04)  | 0.87 (0.37, 1.71)   | 1.20 (0.80, 1.74)   | 0.88 (0.54, 1.34) | 0.97 (0.66, 1.36)  | 0.88 (0.59, 1.26)  | 0.92 (0.70, 1.18)  |
| Serious AEs                             | % subjects             | 77 (25.2%)         | 92 (31.6%)          | 205 (33.9%)         | 176 (28.4%)       | 282 (31.0%)        | 268 (29.5%)        | 550 (30.2%)        |
|                                         | Exposure (PY)          | 884.3              | 808.9               | 2030.1              | 2145.8            | 2914.4             | 2954.7             | 5869.1             |
|                                         | Incidence (per 100 PY) | 8.71 (6.87, 10.88) | 11.37 (9.17, 13.95) | 10.10 (8.76, 11.58) | 8.20 (7.04, 9.51) | 9.68 (8.58, 10.87) | 9.07 (8.02, 10.22) | 9.37 (8.60, 10.19) |

**Supplemental Figure 1.** (A) Proportion of patients with Boolean-based ACR/EULAR remission from baseline of primary studies to the end of the SIRROUND-LTE study period. (B) Change from baseline in CDAI score by visit from baseline of primary studies to the end of the SIRROUND-LTE study period.

**A.**

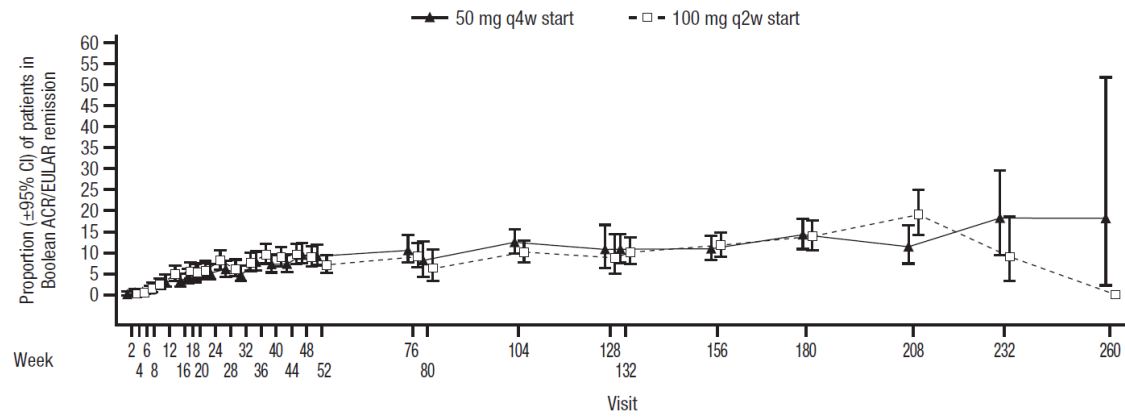

**B.**

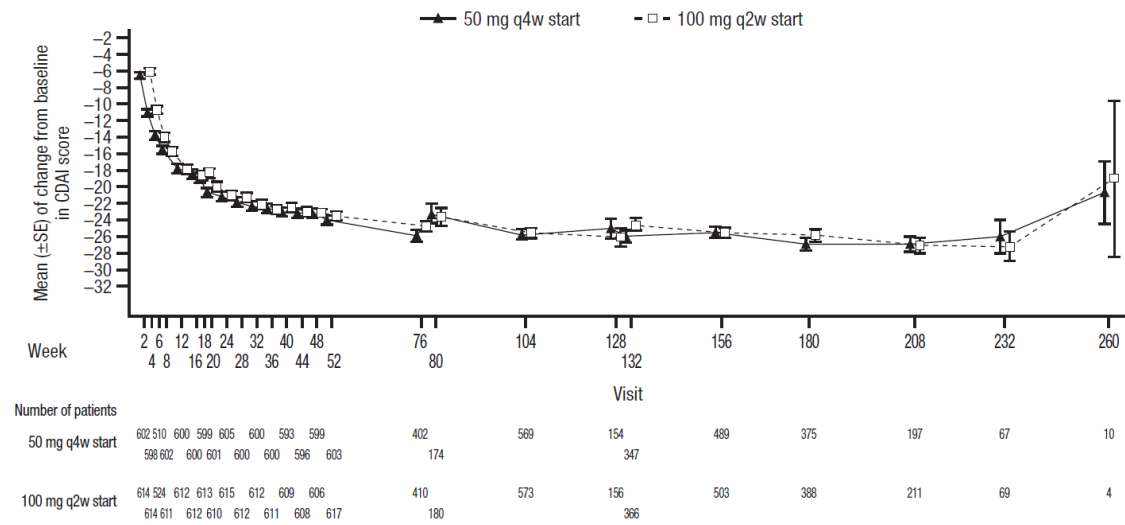

ACR=American College of Rheumatology; CDAI=Clinical Disease Activity Index; EULAR=European League Against Rheumatism; q2w=every 2 weeks; q4w=every 4 weeks; SE, standard error.
